# Supplementary material
Source: Springer Nature journal article supplement (https://www.springermedizin.de/resource/supplementary/12943_2013_1215_MOESM4_ESM.pdf/9552362)

# MUC5AC

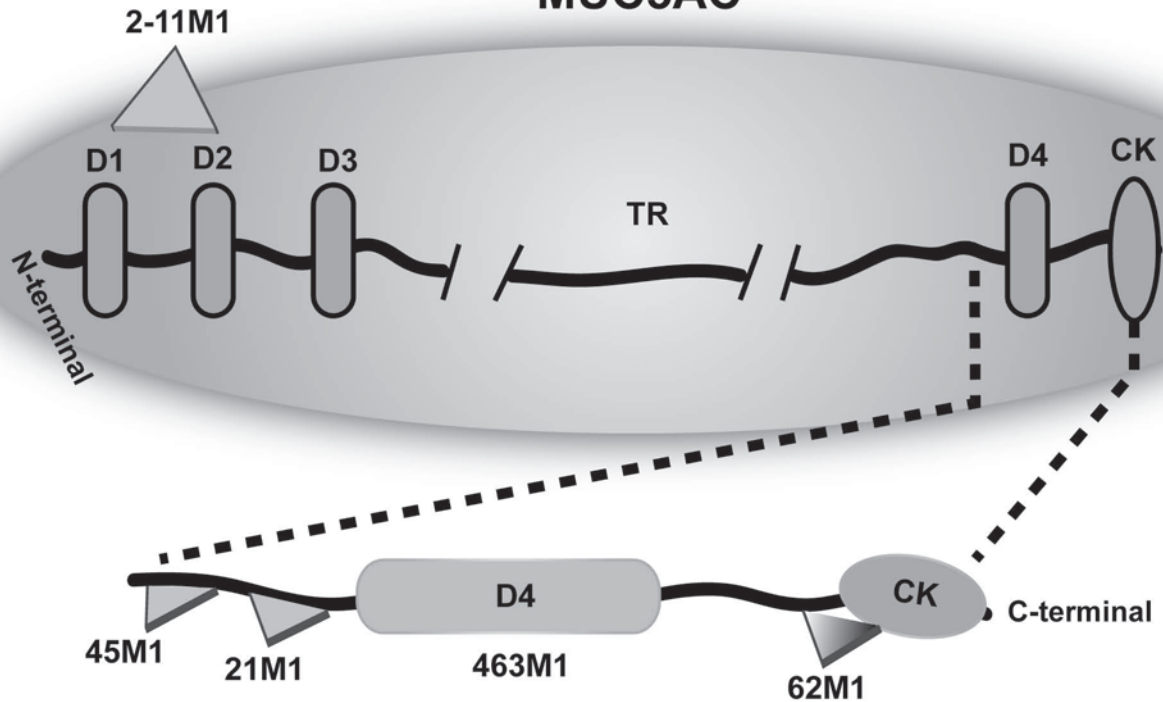

Supplement: MOESM4 [file 9552362]
